# Supplementary material for: Cancer Patients’ Experiences with Telehealth before and during the COVID-19 Pandemic in British Columbia
Source: MDPI journal article supplement (doi:10.3390/curroncol29060335), 2022-06-10
Supplement: s1 [file s1]

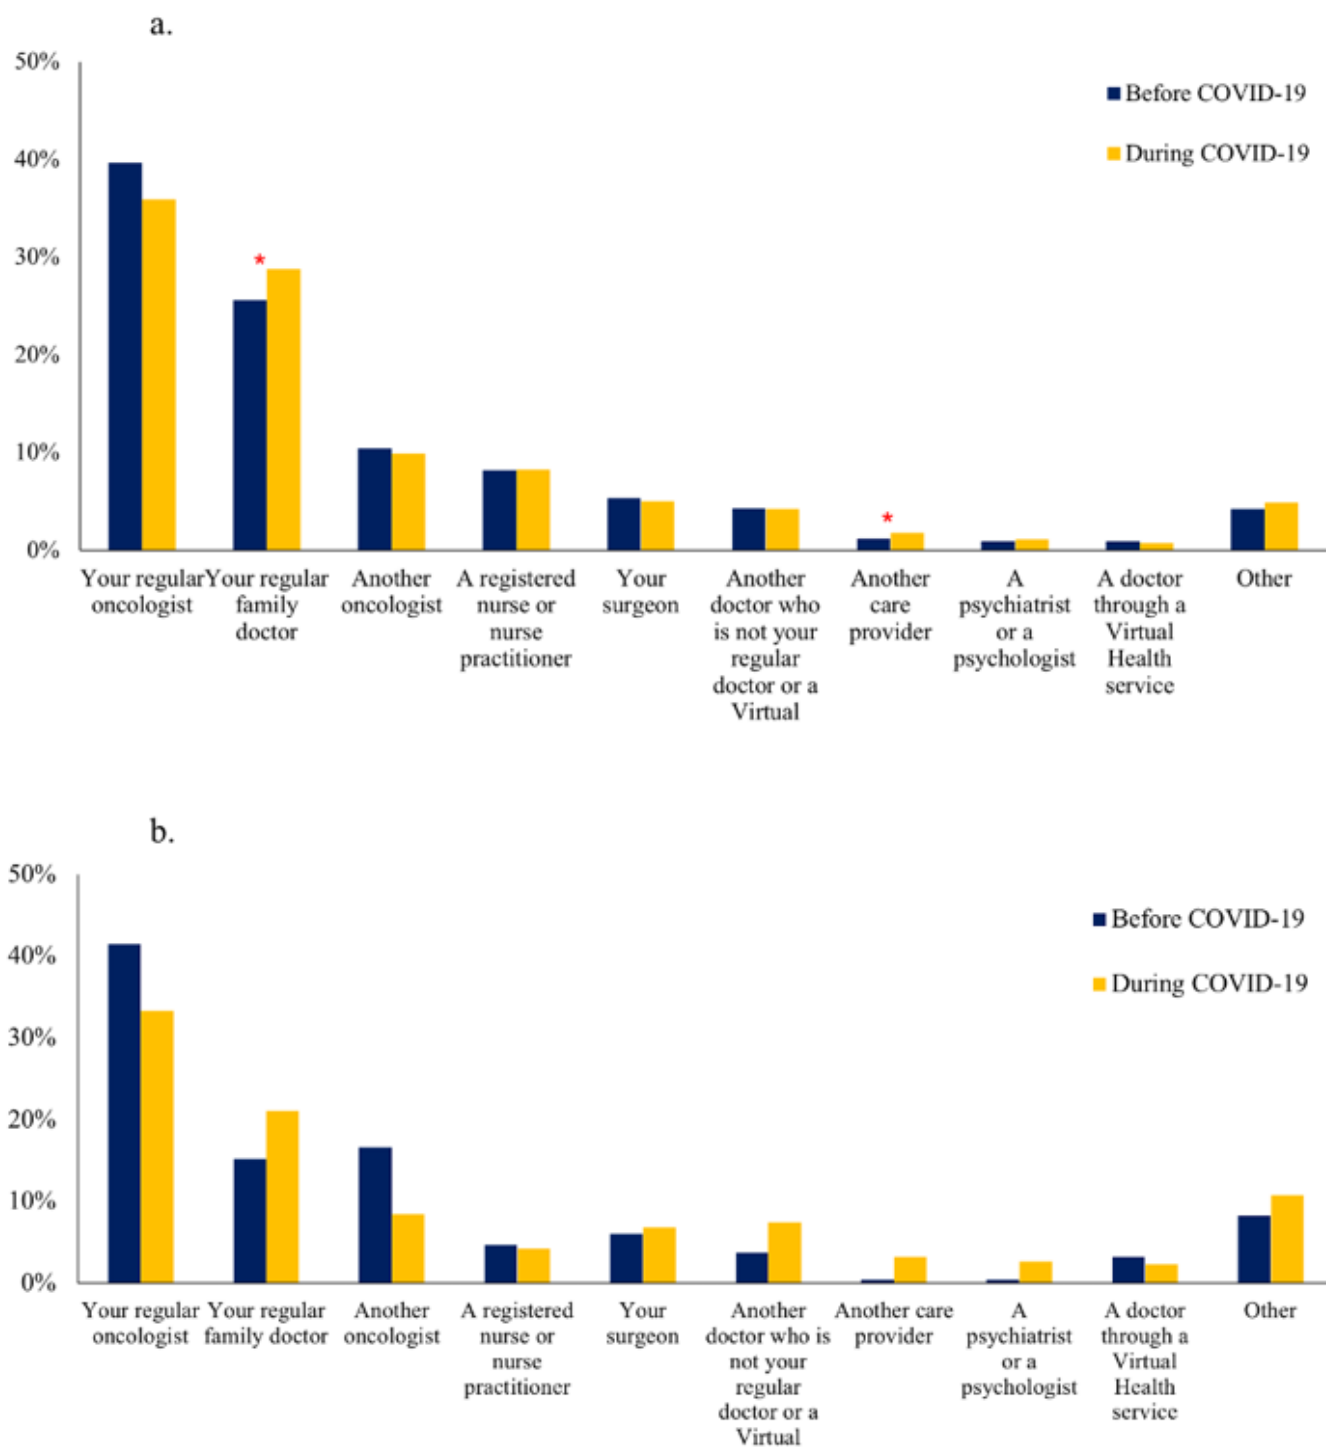

**Figure S1. Proportion of phone (a) and video (b) visits with various healthcare professionals before and during the COVID-19 pandemic**

\* $p < 0.05$
